# Supplementary material for: Safety Outcomes of Brolucizumab in Neovascular Age-Related Macular Degeneration: Results From the IRIS Registry and Komodo Healthcare Map
Source: PubMed Central journal article supplement — JAMA Ophthalmol. 2021 Nov 24;140(1):20–8. doi: 10.1001/jamaophthalmol.2021.4585 (PMC8613703; doi:10.1001/jamaophthalmol.2021.4585), 2021-11-24
Supplement: jamaophthalmol-e214585-s001.pdf [file jamaophthalmol-e214585-s001.pdf]

## Supplemental Online Content

Khanani AM, Zarbin MA, Barakat MR, et al. Safety outcomes of brolucizumab in neovascular age-related macular degeneration: results from the IRIS Registry and Komodo Healthcare Map. *JAMA Ophthalmol*. Published online November 24, 2021. doi:10.1001/jamaophthalmol.2021.4585

**eTable 1.** IRIS Registry and Komodo Healthcare Map Inclusion and Exclusion Criteria

**eTable 2.** Adverse Events Definitions

**eTable 3.** Baseline patient/eye characteristics (overall cohort) at Index.

**eTable 4.** Baseline patient/eye characteristics by cohorts

This supplemental material has been provided by the authors to give readers additional information about their work.

**eTable 1. IRIS Registry and Komodo Healthcare Map Inclusion and Exclusion Criteria**

| Criteria                                                                                                                                                                                                                                                                                                                                                                                                                                                                                                                                                                                                                                                                                                                         | IRIS Registry | Komodo Healthcare Map |
|----------------------------------------------------------------------------------------------------------------------------------------------------------------------------------------------------------------------------------------------------------------------------------------------------------------------------------------------------------------------------------------------------------------------------------------------------------------------------------------------------------------------------------------------------------------------------------------------------------------------------------------------------------------------------------------------------------------------------------|---------------|-----------------------|
| <b>Inclusion Criteria</b>                                                                                                                                                                                                                                                                                                                                                                                                                                                                                                                                                                                                                                                                                                        |               |                       |
| ≥1 HCPCS code (J code) or EHR note for treatment with brolucizumab during the index period (date of earliest code or EHR note=index date)                                                                                                                                                                                                                                                                                                                                                                                                                                                                                                                                                                                        | √             |                       |
| ≥1 HCPCS code (J code or unlisted J code before January 1, 2020) or NDC for treatment with brolucizumab during the index period (date of earliest code=index date)                                                                                                                                                                                                                                                                                                                                                                                                                                                                                                                                                               |               | √                     |
| ≥18 years old on the index date                                                                                                                                                                                                                                                                                                                                                                                                                                                                                                                                                                                                                                                                                                  | √             | √                     |
| ≥1 CPT code for intravitreal administration on the index date                                                                                                                                                                                                                                                                                                                                                                                                                                                                                                                                                                                                                                                                    | √             |                       |
| ≥1 CPT code for intravitreal administration on the index date or ≤7 days afterwards*                                                                                                                                                                                                                                                                                                                                                                                                                                                                                                                                                                                                                                             |               | √                     |
| ≥1 ICD-CM-9/10 code for neovascular AMD in the 36 months prior to or on the index date                                                                                                                                                                                                                                                                                                                                                                                                                                                                                                                                                                                                                                           | √             | √                     |
| ≥1 post-index ophthalmology visit†                                                                                                                                                                                                                                                                                                                                                                                                                                                                                                                                                                                                                                                                                               | √             |                       |
| ≥1 VA eye assessment on the index date or within 365 days prior to the index date‡                                                                                                                                                                                                                                                                                                                                                                                                                                                                                                                                                                                                                                               | √             |                       |
| <b>Exclusion Criteria</b>                                                                                                                                                                                                                                                                                                                                                                                                                                                                                                                                                                                                                                                                                                        |               |                       |
| Use of brolucizumab prior to October 8, 2019 (e.g., clinical trials)                                                                                                                                                                                                                                                                                                                                                                                                                                                                                                                                                                                                                                                             | √             | √                     |
| Unknown laterality of the index eye on the index date (to allow for evaluation of outcomes at the patient-eye level)                                                                                                                                                                                                                                                                                                                                                                                                                                                                                                                                                                                                             | √             | √                     |
| Patients with no data throughout the 12 months immediately prior to the index date                                                                                                                                                                                                                                                                                                                                                                                                                                                                                                                                                                                                                                               |               | √                     |
| <p>AMD, age-related macular degeneration; CM, Clinical Modification; CPT, Current Procedural Terminology; EHR, electronic health records; HCPCS, Healthcare Common Procedure Coding System; ICD, International Classification of Diseases; NDC, National Drug Code; VA, visual acuity.</p> <p>*Off-label use of brolucizumab is not expected given payer access restrictions in the US</p> <p>†Similarly, the definition of a new injection of the same VEGF agent for a given patient eye is if there is no history of that same VEGF agent within 7 days prior to the claim observed. Otherwise, the observation is considered a duplicate.</p> <p>‡For future analyses of larger sample sizes with longer follow-up time.</p> |               |                       |

**eTable 2. Adverse Events Definitions**

| <b>Any form of IOI (including RV) and/or RO</b>                                                                                                                                                                                                                                                                                                                                                | <b>ICD-10 Code</b>                                                                                                                                                                     |
|------------------------------------------------------------------------------------------------------------------------------------------------------------------------------------------------------------------------------------------------------------------------------------------------------------------------------------------------------------------------------------------------|----------------------------------------------------------------------------------------------------------------------------------------------------------------------------------------|
| <b><i>Intraocular Inflammation (IOI)</i></b>                                                                                                                                                                                                                                                                                                                                                   |                                                                                                                                                                                        |
| Acute and Subacute Iridocyclitis                                                                                                                                                                                                                                                                                                                                                               | H20.0X (excluding H20.03X and H20.04X)                                                                                                                                                 |
| Chronic Iridocyclitis                                                                                                                                                                                                                                                                                                                                                                          | H20.1X                                                                                                                                                                                 |
| Other Iridocyclitis                                                                                                                                                                                                                                                                                                                                                                            | H20.9                                                                                                                                                                                  |
| Posterior Synechiae                                                                                                                                                                                                                                                                                                                                                                            | H21.54X                                                                                                                                                                                |
| Focal Chorioretinal Inflammation, Juxtapapillary                                                                                                                                                                                                                                                                                                                                               | H30.0X                                                                                                                                                                                 |
| Disseminated Chorioretinal Inflammation, Peripheral                                                                                                                                                                                                                                                                                                                                            | H30.1X                                                                                                                                                                                 |
| Posterior Cyclitis (Pars Planitis)                                                                                                                                                                                                                                                                                                                                                             | H30.2X                                                                                                                                                                                 |
| Other Chorioretinal inflammations                                                                                                                                                                                                                                                                                                                                                              | H30.8                                                                                                                                                                                  |
| Unspecified Chorioretinal Inflammation                                                                                                                                                                                                                                                                                                                                                         | H30.9X                                                                                                                                                                                 |
| Changes in Retinal Vascular Appearance (Vascular Sheathing)                                                                                                                                                                                                                                                                                                                                    | H35.01X                                                                                                                                                                                |
| Exudative Retinopathy                                                                                                                                                                                                                                                                                                                                                                          | H35.02X                                                                                                                                                                                |
| Vitritis/Other disorders of Vitreous Body                                                                                                                                                                                                                                                                                                                                                      | H43.89                                                                                                                                                                                 |
| Unspecified Papilledema                                                                                                                                                                                                                                                                                                                                                                        | H47.10                                                                                                                                                                                 |
| Papilledema associated with decreased ocular pressure                                                                                                                                                                                                                                                                                                                                          | H47.12                                                                                                                                                                                 |
| Papilledema associated with retinal disorder                                                                                                                                                                                                                                                                                                                                                   | H47.13                                                                                                                                                                                 |
| Optic neuritis (optic papillitis, retrobulbar neuritis, toxic optic neuropathy, other optic neuritis, unspecified optic neuritis)                                                                                                                                                                                                                                                              | H46X (excluding H46.2 for nutritional optic neuropathy)                                                                                                                                |
| Panuveitis                                                                                                                                                                                                                                                                                                                                                                                     | H44.11X                                                                                                                                                                                |
| <b><i>Retinal Vasculitis (RV)</i></b>                                                                                                                                                                                                                                                                                                                                                          |                                                                                                                                                                                        |
| Retinal Vasculitis                                                                                                                                                                                                                                                                                                                                                                             | H35.06X                                                                                                                                                                                |
| <b><i>Retinal Vascular Occlusion (RO)</i></b>                                                                                                                                                                                                                                                                                                                                                  |                                                                                                                                                                                        |
| Retinal Artery Occlusion (RAO)                                                                                                                                                                                                                                                                                                                                                                 | H34.0X (Transient retinal artery occlusion);<br>H34.1X (Central retinal artery occlusion);<br>H34.21X (Partial retinal artery occlusion);<br>H34.23X (Retinal artery branch occlusion) |
| Retinal Vein Occlusion (RVO)                                                                                                                                                                                                                                                                                                                                                                   | H34.81X (Central retinal vein occlusion [CRVO]);<br>H34.83X (Branch retinal vein occlusion [BRVO])                                                                                     |
| Unspecified RO                                                                                                                                                                                                                                                                                                                                                                                 | H34.9 (Unspecified retinal vascular occlusion)                                                                                                                                         |
| Ischemic Optic Neuropathy                                                                                                                                                                                                                                                                                                                                                                      | H47.01X (Ischemic optic neuropathy)                                                                                                                                                    |
| <b><i>Endophthalmitis</i></b>                                                                                                                                                                                                                                                                                                                                                                  |                                                                                                                                                                                        |
| Other Endophthalmitis                                                                                                                                                                                                                                                                                                                                                                          | H44.19                                                                                                                                                                                 |
| Purulent Endophthalmitis                                                                                                                                                                                                                                                                                                                                                                       | H44.0X                                                                                                                                                                                 |
| Hypopyon                                                                                                                                                                                                                                                                                                                                                                                       | H20.05X                                                                                                                                                                                |
| IOI, Intraocular Inflammation; RO, Retinal Vascular occlusion inclusive of retinal vein occlusion and retinal artery occlusion; RV, Retinal vasculitis.<br>*Same definition was applied for the variable – 'prior inflammation and/or occlusion; inflammation/occlusion only includes immune mediated events and excluded infectious events.<br>ICD, International Classification of Diseases. |                                                                                                                                                                                        |

**eTable 3. Baseline patient/eye characteristics (overall cohort) at Index.\***

| Characteristic                                                                                                                                                                                                                                                                                                                                                                                                                                                                                                                                                                                                                                                                                                                                                                                                                                                                                                                                                                                                                                                                                                                                                                                                     | IRIS Registry<br>(N=10,654) | Komodo Healthcare Map<br>(N=11,161) |
|--------------------------------------------------------------------------------------------------------------------------------------------------------------------------------------------------------------------------------------------------------------------------------------------------------------------------------------------------------------------------------------------------------------------------------------------------------------------------------------------------------------------------------------------------------------------------------------------------------------------------------------------------------------------------------------------------------------------------------------------------------------------------------------------------------------------------------------------------------------------------------------------------------------------------------------------------------------------------------------------------------------------------------------------------------------------------------------------------------------------------------------------------------------------------------------------------------------------|-----------------------------|-------------------------------------|
| <b>Eye level</b>                                                                                                                                                                                                                                                                                                                                                                                                                                                                                                                                                                                                                                                                                                                                                                                                                                                                                                                                                                                                                                                                                                                                                                                                   |                             |                                     |
| Age (years), mean ± SD                                                                                                                                                                                                                                                                                                                                                                                                                                                                                                                                                                                                                                                                                                                                                                                                                                                                                                                                                                                                                                                                                                                                                                                             | 80.86 ± 8.39                | 80.26 ± 7.40                        |
| Female, n (%)                                                                                                                                                                                                                                                                                                                                                                                                                                                                                                                                                                                                                                                                                                                                                                                                                                                                                                                                                                                                                                                                                                                                                                                                      | 6,105 (57.30)               | 6,452 (57.81)                       |
| Laterality of treatment with brolocizumab at index date, Unilateral, n (%)                                                                                                                                                                                                                                                                                                                                                                                                                                                                                                                                                                                                                                                                                                                                                                                                                                                                                                                                                                                                                                                                                                                                         | 8,258 (77.51)               | 7,361 (65.95)                       |
| Time since diagnosis of neovascular AMD, <sup>a</sup> days/years, mean ± SD                                                                                                                                                                                                                                                                                                                                                                                                                                                                                                                                                                                                                                                                                                                                                                                                                                                                                                                                                                                                                                                                                                                                        | 760 ± 360/<br>2.08 ± 0.99   | 964 ± 492/<br>2.64 ± 1.35           |
| VA (approximate ETDRS) letter score, <sup>b</sup> mean ± SD                                                                                                                                                                                                                                                                                                                                                                                                                                                                                                                                                                                                                                                                                                                                                                                                                                                                                                                                                                                                                                                                                                                                                        | 62.00 ± 19                  | NA                                  |
| Prior treatment status, Switcher, n (%)                                                                                                                                                                                                                                                                                                                                                                                                                                                                                                                                                                                                                                                                                                                                                                                                                                                                                                                                                                                                                                                                                                                                                                            | 9,686 (90.91)               | 10,487 (93.96)                      |
| Median time on prior anti-VEGF agent, days/years                                                                                                                                                                                                                                                                                                                                                                                                                                                                                                                                                                                                                                                                                                                                                                                                                                                                                                                                                                                                                                                                                                                                                                   | 526/1.44                    | 663/1.82                            |
| ≥2 prior anti-VEGF agents, <sup>c</sup> n (%)                                                                                                                                                                                                                                                                                                                                                                                                                                                                                                                                                                                                                                                                                                                                                                                                                                                                                                                                                                                                                                                                                                                                                                      | 3,667 (37.86)               | 5,087 (45.51)                       |
| Immediately prior anti-VEGF, <sup>d</sup> n (%)                                                                                                                                                                                                                                                                                                                                                                                                                                                                                                                                                                                                                                                                                                                                                                                                                                                                                                                                                                                                                                                                                                                                                                    |                             |                                     |
| Aflibercept <sup>c</sup>                                                                                                                                                                                                                                                                                                                                                                                                                                                                                                                                                                                                                                                                                                                                                                                                                                                                                                                                                                                                                                                                                                                                                                                           | 7,160 (73.92)               | 7,156 (68.24)                       |
| Bevacizumab <sup>c</sup>                                                                                                                                                                                                                                                                                                                                                                                                                                                                                                                                                                                                                                                                                                                                                                                                                                                                                                                                                                                                                                                                                                                                                                                           | 1,000 (10.32)               | 1,706 (16.27)                       |
| Ranibizumab <sup>c</sup>                                                                                                                                                                                                                                                                                                                                                                                                                                                                                                                                                                                                                                                                                                                                                                                                                                                                                                                                                                                                                                                                                                                                                                                           | 1,478 (15.26)               | 1,623 (15.48)                       |
| Number of brolocizumab injections <sup>e</sup> , n (%)                                                                                                                                                                                                                                                                                                                                                                                                                                                                                                                                                                                                                                                                                                                                                                                                                                                                                                                                                                                                                                                                                                                                                             |                             |                                     |
| 1                                                                                                                                                                                                                                                                                                                                                                                                                                                                                                                                                                                                                                                                                                                                                                                                                                                                                                                                                                                                                                                                                                                                                                                                                  | 5,458 (51.23%)              | 4,699 (42.10%)                      |
| 2                                                                                                                                                                                                                                                                                                                                                                                                                                                                                                                                                                                                                                                                                                                                                                                                                                                                                                                                                                                                                                                                                                                                                                                                                  | 3,289 (30.87%)              | 3,086 (27.65%)                      |
| 3+                                                                                                                                                                                                                                                                                                                                                                                                                                                                                                                                                                                                                                                                                                                                                                                                                                                                                                                                                                                                                                                                                                                                                                                                                 | 1,907 (17.90%)              | 3,376 (30.25%)                      |
| <p>AMD, age-related macular degeneration; ETDRS, Early Treatment Diabetic Retinopathy Study; NA, Not available; VA, visual acuity; VEGFs, vascular endothelial growth factor. Index date is the date of first brolocizumab injection. *Measured in the 36-month period prior to the index date (inclusive of the index date) unless otherwise stated. For variables assessed on the index date, the 36-month period prior to the index date (inclusive of the index date) was assessed if information was not available on the index date.</p> <p><sup>a</sup>Time from first neovascular AMD diagnosis to index date. <sup>b</sup>Approximate Snellen equivalent 20/63 in IRIS; Komodo Healthcare Map does not capture visual outcomes. <sup>c</sup>Sample size of switch patients used as denominator. <sup>d</sup>The last prior anti-VEGF treatment before initiation of brolocizumab, among patient eyes previously treated with an anti-VEGF agent, and 48 eyes in IRIS and 2 eyes in Komodo had 'pegaptanib' as the immediate prior anti-VEGF. <sup>e</sup>All patients included in this analysis were new to brolocizumab treatment; number of brolocizumab injections refers to the follow-up period.</p> |                             |                                     |

**eTable 4. Baseline patient/eye characteristics by cohorts**

|                                                                                                                                                                                                                                                                                                             | IRIS Registry                   |                                  |                    | Komodo Healthcare Map           |                                  |                   |
|-------------------------------------------------------------------------------------------------------------------------------------------------------------------------------------------------------------------------------------------------------------------------------------------------------------|---------------------------------|----------------------------------|--------------------|---------------------------------|----------------------------------|-------------------|
|                                                                                                                                                                                                                                                                                                             | Cohort 1                        | Cohort 2                         | Cohort 3           | Cohort 1                        | Cohort 2                         | Cohort 3          |
|                                                                                                                                                                                                                                                                                                             | Control:<br>No IOI<br>and/or RO | All forms of<br>IOI and/or<br>RO | RV<br>and/or<br>RO | Control:<br>No IOI<br>and/or RO | All forms of<br>IOI and/or<br>RO | RV and/or<br>RO   |
| <b>Characteristic</b>                                                                                                                                                                                                                                                                                       | N=10,399<br>eyes                | N=255<br>eyes                    | N=59<br>eyes       | N=10,893<br>eyes                | N=268<br>eyes                    | N=63<br>eyes      |
| Age (years), mean<br>± SD                                                                                                                                                                                                                                                                                   | 80.92 ±<br>8.38                 | 78.78 ±<br>8.32                  | 80.12 ±<br>7.66    | 80.27 ±<br>7.40                 | 79.96 ±<br>7.33                  | 80.79 ±<br>6.23   |
| Female, n (%)                                                                                                                                                                                                                                                                                               | 5915<br>(56.88)                 | 190 (74.51)                      | 47<br>(79.66)      | 6253<br>(57.40)                 | 199<br>(74.25)                   | 50 (79.37)        |
| Duration of follow-<br>up (days), mean ±<br>SD                                                                                                                                                                                                                                                              | 92.74 ±<br>33.55                | 102.69 ±<br>28.10                | 112.20 ±<br>25.68  | 92.75 ±<br>44.60                | 110.29 ±<br>36.98                | 113.10 ±<br>35.05 |
| Prior treatment<br>status, Switcher, n<br>(%)                                                                                                                                                                                                                                                               | 9450<br>(90.87)                 | 236 (92.55)                      | 49<br>(83.05)      | 10234<br>(93.95)                | 253<br>(94.40)                   | 61 (96.83)        |
| <b>Any Prior IOI and/or RO*</b>                                                                                                                                                                                                                                                                             |                                 |                                  |                    |                                 |                                  |                   |
| Past 36 months                                                                                                                                                                                                                                                                                              | 547 (5.26)                      | 42 (16.47)                       | 19<br>(32.20)      | 599 (5.50)                      | 58 (21.64)                       | 20 (31.75)        |
| Past 12 months                                                                                                                                                                                                                                                                                              | 376 (3.62)                      | 37 (14.51)                       | 18<br>(30.51)      | 331 (3.04)                      | 45 (16.79)                       | 17 (26.98)        |
| Past 6 months                                                                                                                                                                                                                                                                                               | 309 (2.97)                      | 37 (14.51)                       | 18<br>(30.51)      | 235 (2.16)                      | 34 (12.69)                       | 12 (19.05)        |
| IOI, Intraocular Inflammation; RO, Retinal Vascular occlusion inclusive of retinal vein occlusion and retinal artery occlusion;<br>RV, Retinal vasculitis.<br>*1 patient eye each with RV and panuveitis had a history of IOI and/or RO in the past 12 months in IRIS Registry and<br>Komodo Healthcare Map |                                 |                                  |                    |                                 |                                  |                   |
